# Supplementary material for: Environmentally benign, facile and selective recovery of gold from aqueous media: synergic role of carbon dots as green reductant and sensor towards Au3+ ions
Source: Royal Society of Chemistry journal article supplement (doi:10.1039/c9ra08050c), 2019-01-01
Supplement: c9ra08050c1.pdf [file c9ra08050c1.pdf]

## Supporting Information

### **Environmentally Benign, Facile and Selective Recovery of Gold from Aqueous medium: Synergic Role of Carbon Dots as Green Reductant and Sensor towards Au<sup>3+</sup> Ions**

*Kaviyarasan Raji,<sup>a</sup> Vadivel Ramanan,<sup>b</sup> Senthil Kumar Thiyagarajan,<sup>a</sup> and Perumal Ramamurthy<sup>\*a</sup>*

<sup>a</sup>National Centre for Ultrafast Processes, University of Madras, Taramani Campus, Chennai - 600113, Tamil Nadu, India.

<sup>b</sup>Forensic Sciences Department, Government of Tamil Nadu, Chennai - 600004, Tamil Nadu, India.

\*Corresponding author E-mail Address: [prm60@hotmail.com](mailto:prm60@hotmail.com)

### **CONTENTS**

|                  |   |                                                                                                                          |
|------------------|---|--------------------------------------------------------------------------------------------------------------------------|
| <b>Table S1</b>  | : | Slope method for the calculation of PL quantum yield of N,S-CDs.                                                         |
| <b>Table S2</b>  | : | Parameters obtained from the fitting of PL decays at various emission wavelengths ( $\lambda_{\text{ex}}$ : 375 nm LED). |
| <b>Table S3</b>  | : | Comparison of the present probe with existing Au <sup>3+</sup> probes                                                    |
| <b>Figure S1</b> | : | Zeta potential of the N,S-CDs.                                                                                           |
| <b>Figure S2</b> | : | Normalized PL spectra of N,S-CDs excited at various wavelengths.                                                         |
| <b>Figure S3</b> | : | Slope method for the calculation of PL QY.                                                                               |
| <b>Figure S4</b> | : | SAED pattern of obtained Au NPs and corresponding d-spacing values.                                                      |

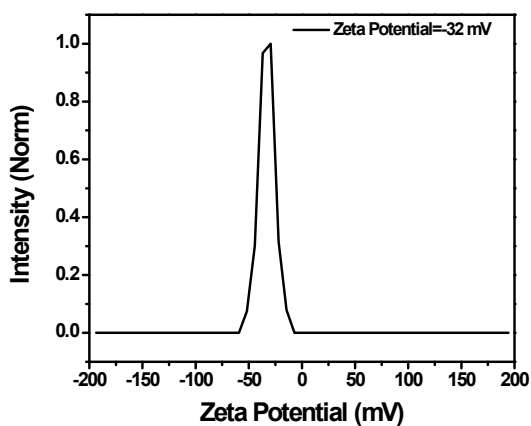

Fig. S1 Zeta potential of the N,S-CDs,

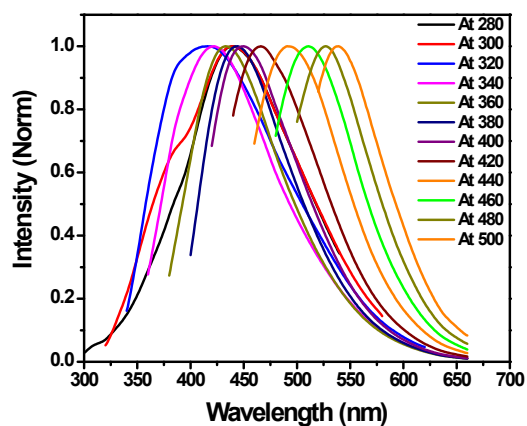

Fig. S2 Normalized PL spectra of N,S-CDs excited at various wavelengths.

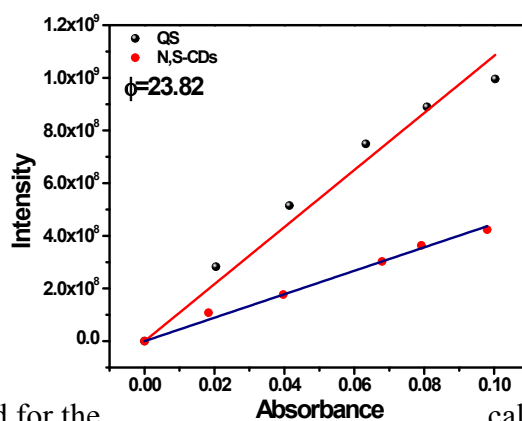

Fig. S3 Slope method for the calculation of PL QY of N,S-CDs.

Table S1. Slope method for the calculation of PL QY of N,S-CDs.

| Fluorescer       | Slope                 | QY     | QY (%)        | Reduced R <sup>2</sup> |
|------------------|-----------------------|--------|---------------|------------------------|
| Quinine Sulphate | $1.08 \times 10^{10}$ | 0.5460 | 54.60 (Known) | 0.99                   |
| N,S-CDs          | $4.45 \times 10^9$    | 0.2382 | 23.82         | 0.99                   |

**Table S2.** Parameters obtained from the fitting of PL decays at various emission wavelengths ( $\lambda_{\text{ex}}$ : 375 nm LED).

| S.No | $\lambda_{\text{em}}$ | $\tau_1$ (ns) | $\tau_2$ (ns) | $\tau_3$ (ns) | $A_1$ (%) | $A_2$ (%) | $A_3$ (%) | $\tau_{\text{Average}}$ (ns) | $\chi^2$ |
|------|-----------------------|---------------|---------------|---------------|-----------|-----------|-----------|------------------------------|----------|
| 1    | 400                   | 0.69          | 3.22          | 8.52          | 9.65      | 52.79     | 37.57     | 2.88                         | 1.11     |
| 2    | 425                   | 0.66          | 3.33          | 8.57          | 8.39      | 49.86     | 41.75     | 3.08                         | 1.14     |
| 3    | 450                   | 0.69          | 3.55          | 9.25          | 7.71      | 49.25     | 43.03     | 3.38                         | 1.12     |
| 4    | 500                   | 0.56          | 3.14          | 9.06          | 7.05      | 39.52     | 53.43     | 3.23                         | 1.18     |
| 5    | 550                   | 0.47          | 2.90          | 9.18          | 9.06      | 37.29     | 53.65     | 2.64                         | 1.11     |
| 6    | 600                   | 0.41          | 2.48          | 8.39          | 12.20     | 35.11     | 52.69     | 1.99                         | 1.17     |

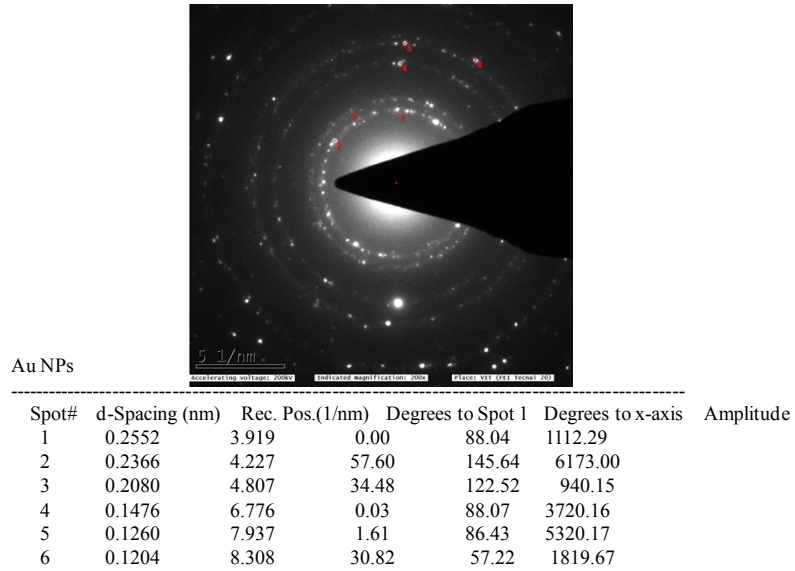

**Fig. S4** SAED pattern of obtained Au NPs and corresponding d-spacing values.

**Table S3.** Comparison of the present probe with existing Au<sup>3+</sup> probes.

| S. No. | Fluorescence Probe                                     | Solvent                                                                           | LOD           | Ref.                        |
|--------|--------------------------------------------------------|-----------------------------------------------------------------------------------|---------------|-----------------------------|
| 1      | Rhodamine-based modified polyacrylic acid              | 0.01 M TBAPF <sub>6</sub> in DMSO                                                 | 11.40 μM      | 1                           |
| 2      | 4-propargylamino-1,8-naphthalimide based probe         | PBS buffer (4% C <sub>2</sub> H <sub>5</sub> OH)                                  | 8.44 μM       | 2                           |
| 3      | Fluorol Red GK                                         | CH <sub>3</sub> CN-HEPES buffer (10 mmol L <sup>-1</sup> , pH 7.4, v : v = 1 : 1) | 1.23 μM       | 3                           |
| 4      | Rhodamine-based modified polyacrylic acid-coated FeNPs | 0.01 M TBAPF <sub>6</sub> in DMSO                                                 | 0.85 μM       | 1                           |
| 5      | Graphene oxide-poly(vinyl alcohol) Hybrid              | Water                                                                             | 0.7 μM        | 4                           |
| 6      | Rhodamine-alkyne derivative                            | C <sub>2</sub> H <sub>5</sub> OH-HEPES buffer (0.01 M, pH 7.4) (1:1, v/v)         | 0.5 μM        | 5                           |
| 7      | Rhodamine-derived N-propargyl-spirolactam P1           | 5 mM HEPES buffer containing 0.25% DMSO, pH 7.4                                   | 0.4 μM        | 6                           |
| 8      | Thioamide-phenyl-substituted alkyne                    | phosphate buffer/C <sub>2</sub> H <sub>5</sub> OH (3:7, pH 7.0)                   | 390 nM        | 7                           |
| 9      | Bodipy derivative                                      | PBS buffer (50 % ethanol)                                                         | 320 nM        | 8                           |
| 10     | Rhodamine-based semicarbazide                          | PBS buffer (0.3% DMF)                                                             | 290 nM        | 9                           |
| 11     | Thiocoumarin derivative                                | CH <sub>3</sub> CN-acetate buffer solution (1:1, v/v)                             | 111 nM        | 10                          |
| 12     | Rhodamine-based semicarbazide                          | PBS buffer (10% CH <sub>3</sub> OH)                                               | 74 nM         | 9                           |
| 13     | Rhodamine/BODIPY based                                 | 1:1 CH <sub>3</sub> CN/HEPES buffer (pH 7.0)                                      | 65 nM         | 11                          |
| 14     | Rhodamine based probe                                  | PBS buffer (1% CH <sub>3</sub> OH)                                                | 50 nM         | 12                          |
| 15     | Rhodamine 6G hydrazide                                 | H <sub>2</sub> O/ C <sub>2</sub> H <sub>5</sub> OH, 7 : 3 (v/v)                   | 48 nM         | 13                          |
| 16     | BODIPY based                                           | 1:1 phosphate buffer (0.1 M)/ C <sub>2</sub> H <sub>5</sub> OH, pH 7.0            | 44 nM         | 14                          |
| 17     | diketopyrrolopyrrole-based                             | Water                                                                             | 18 nM         | 15                          |
| 18     | Rhodamine derivatives                                  | C <sub>2</sub> H <sub>5</sub> OH: water, 7:3 (v/v), 0.1 M HEPES buffer, pH 7.4    | 0.5 nM        | 16                          |
| 19     | N-CDs                                                  | Water                                                                             | 64 nM         | Ref. 40 in the main article |
| 20     | CDs                                                    | Water                                                                             | 3.03 μM       | 17                          |
| 21     | N-CDs                                                  | Water                                                                             | 239 nM        | Ref. 42 in the main article |
| 22     | CDs                                                    | Water                                                                             | 53 nM         | Ref. 41 in the main article |
| 23     | GQDs                                                   | Water                                                                             | 50 nM         | Ref. 48 in the main article |
| 24     | N,S-CDs                                                | <b>Water</b>                                                                      | <b>252 nM</b> | <b>Present work</b>         |

**REFERENCES**

1. N. Niamsa, C. Kaewtong, W. Srinonmuang, B. Wannoo, B. Pulpoka and T. Tuntulani, *Polymer Chemistry*, 2013, **4**, 3039-3046.
2. J. Y. Choi, G.-H. Kim, Z. Guo, H. Y. Lee, K. Swamy, J. Pai, S. Shin, I. Shin and J. Yoon, *Biosensors and Bioelectronics*, 2013, **49**, 438-441.
3. Y. Yang, C. Yin, F. Huo and J. Chao, *RSC Advances*, 2013, **3**, 9637-9640.
4. A. Kundu, R. K. Layek, A. Kuila and A. K. Nandi, *ACS applied materials & interfaces*, 2012, **4**, 5576-5582.
5. M. J. Jou, X. Chen, K. Swamy, H. N. Kim, H.-J. Kim, S.-g. Lee and J. Yoon, *Chemical Communications*, 2009, 7218-7220.
6. H. Seo, M. E. Jun, O. A. Egorova, K.-H. Lee, K.-T. Kim and K. H. Ahn, *Organic letters*, 2012, **14**, 5062-5065.
7. X. Cao, W. Lin and Y. Ding, *Chemistry—A European Journal*, 2011, **17**, 9066-9069.
8. J.-B. Wang, Q.-Q. Wu, Y.-Z. Min, Y.-Z. Liu and Q.-H. Song, *Chemical Communications*, 2012, **48**, 744-746.
9. L. Yuan, W. Lin, Y. Yang and J. Song, *Chemical Communications*, 2011, **47**, 4703-4705.
10. J. E. Park, M. G. Choi and S.-K. Chang, *Inorganic chemistry*, 2012, **51**, 2880-2884.
11. E. Karakuş, M. Üçüncü and M. Emrullahoğlu, *Chemical Communications*, 2014, **50**, 1119-1121.
12. Y.-K. Yang, S. Lee and J. Tae, *Organic letters*, 2009, **11**, 5610-5613.
13. J. Wang, W. Lin, L. Yuan, J. Song and W. Gao, *Chemical Communications*, 2011, **47**, 12506-12508.
14. M. Üçüncü and M. Emrullahoğlu, *Chemical Communications*, 2014, **50**, 5884-5886.

15. X. Yang, Y. Li, Z. Zhao, Y. Ding, Y. Zhang, X. Liu, Y. Cui, G. Sun, G. Zhang and M. Yan, *New Journal of Chemistry*, 2017, **41**, 5055-5060.
16. S. Adhikari, S. Mandal, A. Ghosh, P. Das and D. Das, *The Journal of organic chemistry*, 2015, **80**, 8530-8538.
17. W. Gao, H. Song, X. Wang, X. Liu, X. Pang, Y. Zhou, B. Gao and X. Peng, *ACS applied materials & interfaces*, 2017, **10**, 1147-1154.
